# Supplementary material for: Lb-miR166a has a potentially positive impact on the treatment of kidney cancer
Source: Research Square preprint supplement (doi:10.21203/rs.3.rs-1740960/v1), 2022-06-21
Supplement: Supplementary file 1 [file 055816e6e448895f416a7e0d.docx]

**Supplementary Table 1. Antibody  information**

| Antibody | Art.No | Manufacturer | Immunohistochemical | western blot |
| --- | --- | --- | --- | --- |
| KI67 Polyclonal antibody | Cat No : 27309-1-AP | Proteintech Group, Inc | 1：:5000 |  |
| BAD Monoclonal antibody | Cat No : 67830-1-Ig | Proteintech Group, Inc |  | 1:3000 |
| BCL2 Monoclonal antibody | Cat No : 60178-1-Ig | Proteintech Group, Inc |  | 1:5000 |
| BAX Monoclonal antibody | Cat No. 60267-1-Ig | Proteintech Group, Inc |  | 1:10000 |
| Caspase-3 Antibody - (active/cleaved) | NB100-56113SS | Bio-Techne China Co. Ltd. | | 1:2000 |
| Caspase 3/p17/p19 Monoclonal antibody | Cat No : 66470-2-Ig | Proteintech Group, Inc |  | 1:3000 |
| Cdc20 Polyclonal antibody | Cat No. 10252-1-AP | Proteintech Group, Inc |  | 1:3000 |
| Cyclin D2 Monoclonal antibody | Cat No : 67048-1-Ig | Proteintech Group, Inc |  | 1:3000 |
| cyclin B1 Monoclonal antibody | Cat No : 67686-1-Ig | Proteintech Group, Inc |  | 1:3000 |
| Cyclin A2 Monoclonal antibody | Cat No : 66391-1-Ig | Proteintech Group, Inc |  | 1:5000 |
| Cyclin E2 Polyclonal antibody | Cat No : 11935-1-AP | Proteintech Group, Inc |  | 1:3000 |
| Anti-ID4 antibody | Cat No : ab220166 | Abcam |  | 1:1500 |
| Beta Actin Monoclonal antibody | Cat No : 66009-1-Ig | Proteintech Group, Inc |  | 1:10000 |
| HRP-conjugated Affinipure Goat Anti-Rabbit IgG(H+L) | Cat No. SA00001-2 | Proteintech Group, Inc |  | 1:10000 |
| HRP-conjugated Affinipure Goat Anti-Mouse IgG(H+L) | Cat No. SA00001-1 | Proteintech Group, Inc |  | 1:10000 |

**Supplementary Table 2. Primer sequences of the genes**

| Gene name | Forward | Reverse |
| --- | --- | --- |
| *U6* | CTCGCTTCGGCAGCACA | AACGCTTCACGAATTTGCGT |
| *Lb-miR166a* | ACACTCCAGCTGGGTCGGACCAGGCTTCA | TGGTGTCGTGGAGTCG |
